# Supplementary material
Source: MDPI journal article supplement (https://www.mdpi.com/2077-0472/14/5/743)
Supplement: s1 [file s1]

## Supplementary Table Materials

# Staged Temperature- and Humidity-Controlled Combined Infrared Hot-Air Drying (TH-IRHAD) of Sea Buckthorn Reduces Drying Time, Energy Consumption, and Browning

Lichun Zhu <sup>1</sup>, Xinyu Ji <sup>1</sup>, Junzhe Gu <sup>1</sup>, Xuetao Zhang <sup>1</sup>, Mengqing Li <sup>1</sup>, Qian Zhang <sup>1,2,\*</sup>, Xuhai Yang <sup>1,2,3</sup> and Zhihua Geng <sup>1,\*</sup>

<sup>1</sup> College of Mechanical and Electrical Engineering, Shihezi University, 221 Beisi Road, Shihezi 832003, China; 20202009008@stu.shzu.edu.cn (L.Z.); 20211012426@stu.shzu.edu.cn (X.J.); 20221009235@stu.shzu.edu.cn (J.G.); 20232009039@stu.shzu.edu.cn (X.Z.); limengqing@stu.shzu.edu.cn (M.L.); yxh\_513@shzu.edu.cn (X.Y.)

<sup>2</sup> Xinjiang Production and Construction Corps Key Laboratory of Modern Agricultural Machinery, 221 Beisi Road, Shihezi 832000, China

<sup>3</sup> Engineering Research Center for Production Mechanization of Oasis Special Economic Crop, Ministry of Education, Shihezi 832000, China

\* Correspondence: zq\_mac@shzu.edu.cn (Q.Z.); gzhjdx@shzu.edu.cn (Z.G.); Tel.: 86-15299902258 (Q.Z.); 86-09932057550 (Z.G.)

Supplementary Table S1 Factors and levels of response surface test in first-drying stages

| Factor                                           | Level |    |    |
|--------------------------------------------------|-------|----|----|
|                                                  | -1    | 0  | 1  |
| Drying Temperature $A$ / °C                      | 60    | 70 | 80 |
| Medium Relative Humidity $B$ / %                 | 10    | 25 | 40 |
| High Medium Relative Humidity duration $C$ / min | 20    | 40 | 60 |

Supplementary Table S2 Optimal solution set in first-drying stages

| No.      | Dryin<br>g<br>tempe<br>rature/<br>°C | relativ<br>e<br>humid<br>ity/% | Time/m<br>in  | DT/min         | SEC/<br>kW·h<br>·kg <sup>-1</sup> | NEB/A<br>bs·g <sup>-1</sup><br>DW | <i>L</i> *    | <i>Rr</i> /g·<br>g <sup>-1</sup> | Vc/%         | TFC/mg<br>RE·g <sup>-1</sup><br>DW | TPC/mg<br>GAE·g <sup>-1</sup><br>DW | value<br>of<br>expe<br>ctatio<br>n |
|----------|--------------------------------------|--------------------------------|---------------|----------------|-----------------------------------|-----------------------------------|---------------|----------------------------------|--------------|------------------------------------|-------------------------------------|------------------------------------|
| <b>1</b> | <b>80.000</b>                        | <b>28.413</b>                  | <b>59.851</b> | <b>495.472</b> | <b>4.297</b>                      | <b>0.825</b>                      | <b>37.010</b> | <b>1.650</b>                     | <b>24.40</b> | <b>15.908</b>                      | <b>9.773</b>                        | <b>0.685</b>                       |
| 2        | 80.000                               | 28.259                         | 59.569        | 495.886        | 4.305                             | 0.822                             | 37.055        | 1.650                            | 24.50        | 15.928                             | 9.753                               | 0.685                              |
| 3        | 80.000                               | 27.714                         | 58.684        | 497.195        | 4.330                             | 0.814                             | 37.195        | 1.650                            | 24.70        | 15.994                             | 9.690                               | 0.685                              |
| 4        | 80.000                               | 29.174                         | 61.106        | 493.495        | 4.258                             | 0.839                             | 36.800        | 1.650                            | 24.10        | 15.806                             | 9.870                               | 0.685                              |
| 5        | 80.000                               | 29.310                         | 61.329        | 493.129        | 4.250                             | 0.841                             | 36.762        | 1.650                            | 24.00        | 15.787                             | 9.888                               | 0.685                              |
| 6        | 80.000                               | 29.491                         | 61.625        | 492.637        | 4.240                             | 0.845                             | 36.710        | 1.650                            | 24.00        | 15.761                             | 9.912                               | 0.684                              |
| 7        | 80.000                               | 26.965                         | 57.416        | 498.944        | 4.364                             | 0.802                             | 37.384        | 1.650                            | 24.90        | 16.078                             | 9.605                               | 0.684                              |
| 8        | 80.000                               | 29.715                         | 61.988        | 492.024        | 4.228                             | 0.849                             | 36.646        | 1.650                            | 23.90        | 15.729                             | 9.943                               | 0.684                              |
| 9        | 80.000                               | 29.717                         | 59.689        | 494.444        | 4.270                             | 0.813                             | 37.015        | 1.659                            | 24.10        | 15.851                             | 9.765                               | 0.684                              |
| 10       | 80.000                               | 29.842                         | 62.192        | 491.673        | 4.221                             | 0.851                             | 36.609        | 1.650                            | 23.80        | 15.710                             | 9.960                               | 0.683                              |
| 11       | 80.000                               | 30.208                         | 60.312        | 493.266        | 4.246                             | 0.819                             | 36.909        | 1.660                            | 23.90        | 15.795                             | 9.816                               | 0.683                              |
| 12       | 80.000                               | 30.489                         | 61.718        | 491.466        | 4.213                             | 0.839                             | 36.676        | 1.656                            | 23.70        | 15.704                             | 9.928                               | 0.683                              |
| 13       | 80.000                               | 26.498                         | 56.618        | 499.980        | 4.384                             | 0.795                             | 37.498        | 1.650                            | 25.10        | 16.126                             | 9.556                               | 0.683                              |
| 14       | 79.845                               | 28.809                         | 60.370        | 495.957        | 4.303                             | 0.827                             | 36.980        | 1.650                            | 24.20        | 15.872                             | 9.808                               | 0.683                              |
| 15       | 80.000                               | 26.342                         | 56.350        | 500.318        | 4.390                             | 0.793                             | 37.535        | 1.650                            | 25.10        | 16.141                             | 9.539                               | 0.682                              |
| 16       | 79.776                               | 28.225                         | 59.347        | 498.085        | 4.344                             | 0.815                             | 37.170        | 1.650                            | 24.50        | 15.955                             | 9.730                               | 0.681                              |
| 17       | 80.000                               | 32.687                         | 58.499        | 491.643        | 4.200                             | 0.774                             | 37.130        | 1.682                            | 23.50        | 15.730                             | 9.712                               | 0.681                              |
| 18       | 80.000                               | 32.005                         | 60.409        | 490.816        | 4.190                             | 0.807                             | 36.855        | 1.671                            | 23.50        | 15.689                             | 9.846                               | 0.681                              |
| 19       | 80.000                               | 32.943                         | 58.845        | 490.882        | 4.185                             | 0.777                             | 37.072        | 1.682                            | 23.50        | 15.700                             | 9.743                               | 0.680                              |
| 20       | 80.000                               | 25.835                         | 56.857        | 500.000        | 4.388                             | 0.803                             | 37.469        | 1.644                            | 25.20        | 16.145                             | 9.580                               | 0.679                              |

Supplementary Table S3 The results in first-drying stages optimum test were verified

| Index            | $DT/\text{min}$ | $SEC/\text{kW}\cdot\text{h}\cdot\text{kg}^{-1}$ | $NEB/\text{Abs}\cdot\text{g}^{-1}\text{DW}$ | $L$   | $Rr/\text{g}\cdot\text{g}^{-1}$ | $Vc/\%$ | $TFC/\text{mg RE}\cdot\text{g}^{-1}\text{DW}$ | $TPC/\text{mg GAE}\cdot\text{g}^{-1}\text{DW}$ |
|------------------|-----------------|-------------------------------------------------|---------------------------------------------|-------|---------------------------------|---------|-----------------------------------------------|------------------------------------------------|
| Predicted Value  | 495.59          | 4.30                                            | 0.82                                        | 37.02 | 1.65                            | 24.00   | 15.91                                         | 9.77                                           |
| Trial Value      | 500.00          | 4.32                                            | 0.79                                        | 38.24 | 1.67                            | 23.00   | 16.51                                         | 10.04                                          |
| Relative Error/% | 0.89            | 0.47                                            | 3.66                                        | 3.30  | 1.21                            | 4.17    | 3.77                                          | 2.76                                           |

Supplementary Table S4 Factors and levels of response surface test in second-drying stages

| Factor                                 | Level |    |     |
|----------------------------------------|-------|----|-----|
|                                        | -1    | 0  | 1   |
| Drying Temperature $A$ / °C            | 60    | 70 | 80  |
| Medium Relative Humidity $B$ / %       | 10    | 25 | 40  |
| High Moisture Retention Time $C$ / min | 10    | 65 | 120 |

Supplementary Table S5 Optimal solution set in second-drying stages

| N<br>o.  | Dryin<br>g<br>tempe<br>rature/<br>°C | relativ<br>e<br>humid<br>ity/% | Time/m<br>in  | DT/min         | SEC/<br>kW·h<br>·kg <sup>-1</sup> | NEB/A<br>bs·g <sup>-1</sup><br>DW | <i>L</i> *    | <i>Rr</i> /g·<br>g <sup>-1</sup> | Vc/%         | <i>TFC</i> /mg<br>RE·g <sup>-1</sup><br>DW | <i>TPC</i> /mg<br>GAE·g <sup>-1</sup><br>DW | value<br>of<br>expe<br>ctatio<br>n |
|----------|--------------------------------------|--------------------------------|---------------|----------------|-----------------------------------|-----------------------------------|---------------|----------------------------------|--------------|--------------------------------------------|---------------------------------------------|------------------------------------|
| <b>1</b> | <b>78.315</b>                        | <b>16.601</b>                  | <b>84.307</b> | <b>466.735</b> | <b>4.350</b>                      | <b>0.431</b>                      | <b>39.777</b> | <b>1.658</b>                     | <b>21.40</b> | <b>15.847</b>                              | <b>11.040</b>                               | <b>0.458</b>                       |
| 2        | 78.320                               | 16.631                         | 84.716        | 466.640        | 4.350                             | 0.431                             | 39.776        | 1.658                            | 21.40        | 15.848                                     | 11.028                                      | 0.458                              |
| 3        | 78.302                               | 16.554                         | 83.799        | 466.901        | 4.350                             | 0.431                             | 39.779        | 1.658                            | 21.40        | 15.848                                     | 11.051                                      | 0.458                              |
| 4        | 78.309                               | 16.569                         | 83.895        | 466.835        | 4.350                             | 0.431                             | 39.778        | 1.658                            | 21.40        | 15.846                                     | 11.050                                      | 0.458                              |
| 5        | 78.291                               | 16.517                         | 83.408        | 467.038        | 4.350                             | 0.431                             | 39.780        | 1.657                            | 21.40        | 15.849                                     | 11.059                                      | 0.458                              |
| 6        | 78.342                               | 16.685                         | 85.045        | 466.434        | 4.350                             | 0.431                             | 39.773        | 1.658                            | 21.40        | 15.843                                     | 11.027                                      | 0.458                              |
| 7        | 78.289                               | 16.493                         | 82.957        | 467.115        | 4.350                             | 0.431                             | 39.780        | 1.657                            | 21.40        | 15.847                                     | 11.073                                      | 0.458                              |
| 8        | 78.345                               | 16.756                         | 86.120        | 466.273        | 4.350                             | 0.431                             | 39.773        | 1.659                            | 21.50        | 15.849                                     | 10.994                                      | 0.458                              |
| 9        | 78.321                               | 16.708                         | 85.948        | 466.470        | 4.350                             | 0.430                             | 39.776        | 1.659                            | 21.40        | 15.855                                     | 10.990                                      | 0.458                              |
| 10       | 78.388                               | 17.018                         | 88.762        | 465.611        | 4.350                             | 0.431                             | 39.765        | 1.661                            | 21.50        | 15.851                                     | 10.934                                      | 0.458                              |
| 11       | 78.135                               | 15.983                         | 76.231        | 469.057        | 4.347                             | 0.433                             | 39.791        | 1.652                            | 21.20        | 15.851                                     | 11.234                                      | 0.458                              |
| 12       | 78.491                               | 17.652                         | 93.941        | 464.201        | 4.350                             | 0.433                             | 39.741        | 1.664                            | 21.70        | 15.849                                     | 10.830                                      | 0.458                              |
| 13       | 78.457                               | 17.937                         | 96.867        | 464.190        | 4.350                             | 0.432                             | 39.736        | 1.666                            | 21.80        | 15.875                                     | 10.744                                      | 0.458                              |
| 14       | 78.681                               | 19.075                         | 103.392       | 461.517        | 4.350                             | 0.443                             | 39.676        | 1.669                            | 22.20        | 15.845                                     | 10.653                                      | 0.457                              |
| 15       | 76.541                               | 13.899                         | 43.010        | 479.387        | 4.252                             | 0.450                             | 39.787        | 1.626                            | 21.20        | 16.046                                     | 11.709                                      | 0.442                              |
| 16       | 60.000                               | 19.313                         | 10.000        | 478.584        | 4.250                             | 0.418                             | 39.966        | 1.724                            | 20.90        | 17.034                                     | 9.752                                       | 0.434                              |
| 17       | 60.000                               | 19.195                         | 10.929        | 479.794        | 4.269                             | 0.414                             | 39.988        | 1.725                            | 20.80        | 17.084                                     | 9.759                                       | 0.433                              |
| 18       | 72.710                               | 14.100                         | 10.000        | 486.433        | 4.007                             | 0.469                             | 39.690        | 1.613                            | 22.50        | 16.479                                     | 11.490                                      | 0.427                              |
| 19       | 72.834                               | 14.092                         | 10.506        | 486.352        | 4.011                             | 0.470                             | 39.689        | 1.612                            | 22.50        | 16.464                                     | 11.518                                      | 0.427                              |
| 20       | 72.174                               | 13.616                         | 10.000        | 487.420        | 4.023                             | 0.455                             | 39.740        | 1.614                            | 22.40        | 16.617                                     | 11.220                                      | 0.427                              |

Supplementary Table S6 The results in second-drying stages optimum test were verified

| Index               | <i>DT</i> /min | <i>SEC</i> /kW·h<br>·kg <sup>-1</sup> | <i>NEB</i> /Abs<br>·g <sup>-1</sup> DW | <i>L</i> | <i>Rr</i> /g·g <sup>-1</sup> | <i>Vc</i> /% | <i>TFC</i> /mg<br>RE·g <sup>-1</sup><br>DW | <i>TPC</i> /mg<br>GAE·g <sup>-1</sup><br>DW |
|---------------------|----------------|---------------------------------------|----------------------------------------|----------|------------------------------|--------------|--------------------------------------------|---------------------------------------------|
| Predicted<br>Value  | 466.78         | 4.35                                  | 0.43                                   | 39.78    | 1.66                         | 21.00        | 15.85                                      | 11.04                                       |
| Trial<br>Value      | 455.00         | 4.15                                  | 0.41                                   | 40.69    | 1.69                         | 22.00        | 16.62                                      | 10.49                                       |
| Relative<br>Error/% | 2.52           | 4.60                                  | 4.65                                   | 2.29     | 1.81                         | 4.76         | 4.86                                       | 4.98                                        |

Supplementary Table S7 Experimental design and related parameters in third-drying stages

| Technological parameter                      | No. | Level | Time quantum |
|----------------------------------------------|-----|-------|--------------|
| First-drying stage: 80°C-28%-60 min          | 1   | 60°C  | Finish       |
| Second-drying stage: 78°C-17%-84 min         | 2   | 65°C  | Finish       |
| Third-drying stage: Humidification off, set  | 3   | 70°C  | Finish       |
| the moisture removal value of 10%, different | 4   | 75°C  | Finish       |
| drying temperature                           | 5   | 80°C  | Finish       |



Supplementary Table S8  $D_{eff}$  in the drying process of sea buckthorn at different temperatures

| No. | Drying Process | $D_{eff}/\text{m}^2\cdot\text{s}^{-1}$  | $DT/\text{min}$           |
|-----|----------------|-----------------------------------------|---------------------------|
| 1   | 60°C-10%       | $1.47\times 10^{-8}\text{ }^{\text{d}}$ | $1026\text{ }^{\text{c}}$ |
| 2   | 65°C-10%       | $1.56\times 10^{-8}\text{ }^{\text{c}}$ | $753\text{ }^{\text{d}}$  |
| 3   | 70°C-10%       | $1.84\times 10^{-8}\text{ }^{\text{b}}$ | $577\text{ }^{\text{c}}$  |
| 4   | 75°C-10%       | $1.89\times 10^{-8}\text{ }^{\text{b}}$ | $455\text{ }^{\text{b}}$  |
| 5   | 80°C-10%       | $2.04\times 10^{-8}\text{ }^{\text{a}}$ | $363\text{ }^{\text{a}}$  |

Note: Different letters indicate significant differences in samples ( $p < 0.05$ )

Supplementary Table S9 Normalized results and comprehensive scores of index parameters at different drying temperatures

| No. | Drying Process | <i>DT</i> | <i>SEC</i> | <i>Rr</i> | <i>L*</i> | <i>NEB</i> | Vc<br>Retention<br>Rate | <i>TFV</i> | <i>TPC</i> | Comprehensive<br>Evaluation |
|-----|----------------|-----------|------------|-----------|-----------|------------|-------------------------|------------|------------|-----------------------------|
| 1   | 60°C-10%       | 0         | 0          | 0         | 0.25      | 0.53       | 0                       | 1.00       | 1.00       | 0.38                        |
| 2   | 65°C-10%       | 0.41      | 0.41       | 0.71      | 0.75      | 0.87       | 0.20                    | 0.59       | 0.67       | 0.57                        |
| 3   | 70°C-10%       | 0.68      | 0.66       | 1.00      | 1.00      | 1.00       | 0.60                    | 0.50       | 0.22       | 0.67                        |
| 4   | 75°C-10%       | 0.86      | 0.84       | 0.34      | 0.34      | 0.47       | 0.80                    | 0.19       | 0.11       | 0.50                        |
| 5   | 80°C-10%       | 1.00      | 1.00       | 0         | 0         | 0          | 1.00                    | 0          | 0          | 0.40                        |

Supplementary Table S10 Quality analysis of sea buckthorn under different drying methods

| Drying Process                                       | <i>DT</i> /min            | <i>SEC</i> /kW·h·kg <sup>-1</sup> | <i>NEB</i> /Abs·g <sup>-1</sup> DW | <i>L</i> *                  | <i>Rr</i> /g·g <sup>-1</sup> | <i>Vc</i> /%                | <i>TFC</i> /mg RE·g <sup>-1</sup> DW | <i>TPC</i> /mg GAE·g <sup>-1</sup> DW |
|------------------------------------------------------|---------------------------|-----------------------------------|------------------------------------|-----------------------------|------------------------------|-----------------------------|--------------------------------------|---------------------------------------|
| Three-stage temperature control and humidity control |                           |                                   |                                    |                             |                              |                             |                                      |                                       |
| 70°C-10%                                             | 577<br>±8.21 <sup>b</sup> | 4.67<br>±0.05 <sup>c</sup>        | 0.33<br>±0.02 <sup>b</sup>         | 41.90<br>±0.12 <sup>a</sup> | 1.79<br>±0.01 <sup>a</sup>   | 21.24<br>±0.54 <sup>c</sup> | 18.76<br>±0.12 <sup>a</sup>          | 10.83<br>±0.21 <sup>a</sup>           |
| Dry at constant temperature and humidity             |                           |                                   |                                    |                             |                              |                             |                                      |                                       |
| 75°C-10%                                             | 880<br>±9.24 <sup>a</sup> | 7.33<br>±0.06 <sup>a</sup>        | 0.42<br>±0.01 <sup>a</sup>         | 38.46<br>±0.09 <sup>c</sup> | 1.53<br>±0.01 <sup>c</sup>   | 28.32<br>±0.94 <sup>b</sup> | 15.56<br>±0.09 <sup>b</sup>          | 8.44<br>±0.18 <sup>b</sup>            |
| Dry at constant temperature and humidity             |                           |                                   |                                    |                             |                              |                             |                                      |                                       |
|                                                      | 580<br>±7.84 <sup>b</sup> | 5.64<br>±0.18 <sup>b</sup>        | 0.26<br>±0.02 <sup>c</sup>         | 39.28<br>±0.09 <sup>b</sup> | 1.69<br>±0.01 <sup>b</sup>   | 31.94<br>±1.20 <sup>a</sup> | 13.13<br>±0.10 <sup>c</sup>          | 7.06<br>±0.13 <sup>c</sup>            |

Note: Different letters indicate significant differences in samples ( $p < 0.05$ )
